# Supplementary material for: Determining the hip joint isokinetic muscle strength and range of motion of professional soccer players based on their field position
Source: PeerJ. 2022 Oct 26;10:e14000. doi: 10.7717/peerj.14000 (PMC9617545; doi:10.7717/peerj.14000)
Supplement: Supplemental Information 1 [file peerj-10-14000-s001.xlsx]

## Sheet: Sheet1
							Out Come Meaurse	IsomKinetic Dynamometer (BIODEX)																						Muscle Flexibility Test
	Age	Weight kg	Height M	BMI	Prefered Leg	Position		Peak Torque Hip Flexion 90	Average Peak Hip Flexion 90	AGON/ANTAG RATIO %	Peak Torque Hip Extension 90	Average Peak Hip Extension 90	Total Work Hip Extension 90	Peak Torque Hip Flexion 180	Average Peak Hip Flexion 180	AGON/ANTAG RATIO %	Peak Torque Hip Extension 180	Averag Peak Torque Hip Extension 180	Peak Torque Hip Abduction 90	Average Peak Hip Abduction 90	AGON/ANTAG RATIO %	Peak Torque Hip Adduction 90	Average Peak Hip Adduction 90	Peak Torque Hip Abduction 180	Average Peak Hip Abduction 180	AGON/ANTAG RATIO %	Peak Torque Hip Adduction 180	Average Peak Hip Adduction 180	Total Work Hip Adduction 180		Hip ROM
1	29	91	176	29.3776	Rt	Goalkeeper		95.4	90.8	64.3	148.3	126.3		79.1	76.4	71.8	110.6	107.8	64.3	59.6	126.5	50.8	40	50.7	34.9	141.2	35.9	18.4			20
1	21	71.4	178	22.535	Rt	Goalkeeper		120.7	113.5	61.5	196.2	174.3		120.5	111	74.1	162.2	149.7	79.1	74.5	50.5	156.8	140.1	124.4	112.1	84.7	146.8	132.9			20
1	26	77	177	24.5779	Rt	Goalkeeper		118	114.3	61.7	191.4	176.4		108.2	91.9	61.7	164	151.7	67.6	56.3	66	126.9	113.5	61	59.3	53.2	106.8	98.2			19
1	21	79	182	23.8498	Lt	Goalkeeper		94.5	90.1	60.4	157.1	133.5		78.1	71	48.4	161.2	126.2	69.5	58	103.3	67.2	59.2	57.8	52.2	73.4	78.7	54.2			21
1	34	94	186	27.1708	rt	Goalkeeper		147.2	129.4	72.9	202.2	174.1		119.8	105.4	52.7	227.2	162.1	81.6	74	51.6	158.1	137.8	80.6	73.6	58.9	136.7	120.4			19
1	25	95.5	186	27.6043	Rt	Goalkeeper		130.7	128	58.7	222.7	211.8		113.7	91.8	56.8	200.2	149.6	90.3	83	56.2	160.8	145.7	54.6	46.2	46.5	117.4	104.9			21
1	20	67.5	171	23.084	Rt	Goalkeeper		101.7	92.2	57.2	177.9	167.7		93.8	86.7	59.6	157.4	144.2	78.4	58.3	62.5	125.5	114.6	51	48.3	52.7	96.8	91			21
1	21	75.5	183	22.5447	Rt	Goalkeeper		90.2	68.7	67.2	134.2	107.8		75.1	71.5	52.8	142.1	119.4	63.6	54.6	70.7	90	85.5	51.7	37.7	82.6	62.6	54.8			17
1	22	86.5	183	25.8294	Rt	Goalkeeper		76.7	63.7	88.9	86.2	67.7		58.8	48.7	83.1	70.8	48.3	30	19.9	115.1	26	24.9	26.2	19.4	159.3	16.5	11.3			18
1	20	90	175	29.3878	Rt	Goalkeeper		103	94.2	64.6	159.3	146.1		83.1	78.9	59.8	139	131.6	44	39.9	40.3	109.1	93.6	36.6	33.4	30.9	118.6	114.2			19
1	29	69	176	22.2753	Rt	Goalkeeper		91.2	85.8	67.5	135.1	97.8		86.9	75.9	80.6	107.9	97.3	61.8	55.9	138.5	44.6	38	28.3	14.5	69	41.1	27.2			19
1	24	77	182	23.246	Rt	Goalkeeper		115.7	108.2	53.9	214.6	187.8		81.8	77.1	49.1	166.6	157.8	112.6	89.7	108.4	103.9	91.8	62	42.5	72.9	85.1	67.7			18
1	22	64	175	20.898	Rt	Goalkeeper		69.2	63.1	70.3	98.5	89		65.6	56.3	83.5	78.5	64.6	43.7	36.6	119.7	36.5	29.4	34.7	27.8	81.9	42.4	28.1			18
1	25	73	177	23.3011	Rt	Goalkeeper		84.2	67.8	77.2	109	88.5		80.6	71.2	67	120.3	101.2	52.2	49	104.7	49.8	41.9	47.7	37.6	209.2	22.8	17.3			20
1	23	65.5	170	22.6644	Rt	Goalkeeper		105.7	103.2	69.9	151.3	132.8		100.4	89.5	91.9	109.3	95.3	63.1	57.4	76.9	82	65.9	58.4	44.5	143.5	40.7	36.9			20
1	20	50.6	165	18.5859	Rt	Goalkeeper		84.4	74.6	72.1	117.1	109.1		54.6	48.2	61.2	89.2	71.4	46.5	41.7	70.8	65.6	52.7	39.9	34.3	63.4	62.9	48.4			18
1	21	72	180	22.2222	Rt	Goalkeeper		124.8	119.8	56.5	221	208		104	101	54.4	191.2	181.4	70.7	58.6	51.8	136.5	126.5	36.1	29.3	22.4	160.6	142.6			18
1	23	63.5	181	19.3828	Rt	Goalkeeper		118.6	102.2	76.5	155.1	134		88.3	83.8	70.9	124.5	114.2	81.5	77	49.4	164.9	132.3	61.6	54.9	45.3	136	124.3			20
1	23	77.5	179	24.1878	Rt	Goalkeeper		93.3	80.8	52.2	178.8	162.7		90.3	80.4	64.2	140.6	102.3	45.2	36.7	37.9	119.3	84.9	37.6	26	29.4	127.9	110.3			20
1	26	74	179	23.0954	Rt	Goalkeeper		68.5	57.9	79.6	86	56.9		68.2	64.2	92.4	73.8	68.6	67.1	62.5	129.1	52	41.8	31.6	14.6	195.2	16.2	11			26
1	21	66	169	23.1084	Rt	Goalkeeper		68.3	57.6	128. 6	53.1	30.9		58	48.3	277	21	15.8	32.1	25.7	133.4	24.1	13.5	16.9	14.4	32.3	52.3	28.5			21
1	29	102.5	187	29.3117	RT	Goalkeeper		100.4	86.4	58.9	170.3	105.2		119.2	99.2	108.2	110.1	101.3	73.4	37.5	188.2	39	25	44.8	32.9	113.1	39.7	28			20
1	19	91	184	26.8785	RT	Goalkeeper		102	92.5	61.3	166.3	153.6		96.8	80.5	58.1	166.6	150.7	56.7	40.6	63.8	88.8	79.9	60.6	51.6	48.6	124.7	112.5			22
1	22	70	181	21.3669	RT	Goalkeeper		111.9	106.1	58.5	191.4	182.6		109.1	99.9	63.9	170.7	155	54.5	50.4	40.5	134.6	95.6	75.8	60.7	104.2	77.8	62.6			20
2	19	64	174	21.1389	Rt	Defender		117.9	112.8	51.3	229.7	206.1		109.9	100.4	58.1	189	173.6	62	54.5	42.8	144.8	131.3	57.5	46.6	43.2	133	114.5			15
2	20	64	172	21.6333	Rt	Defender		106	102.3	55.4	191.3	184.7		96.2	91	54.9	175.3	163.8	52.1	43.9	49.8	104.6	83.7	36.9	31.4	28.8	128.3	94			16
2	19	55	177	17.5556	LT	Defender		95	87.9	55.2	172.1	141.7		95.3	85.5	53.5	178	139	45.1	39.1	34.4	131.4	109.7	40.7	37.9	41.6	97.7	80.5			16
2	25	68.6	180	21.1728	RT	Defender		100.1	92.1	76.5	130.9	116.8		88.2	76.2	87.8	100.5	81.4	67.8	51.9	90.4	75.1	70	52.5	42.6	103.8	50.6	39.2			16
2	30	68	169	23.8087	RT	Defender		90.8	72.2	70.9	128	102.8		89.1	66.8	80.5	110.7	91.4	56.6	54.6	83.2	68	56.1	42.2	23.3	149	28.2	20.5			14
2	30	62	156	25.4767	Rt	Defender		97	91.7	59.2	163.7	150		78.9	75.2	50.5	156.3	126.7	77.4	72.2	53.1	145.8	125.9	67.9	59.1	53.4	127.1	114.4			19
2	19	70	163	26.3465	RT	Defender		89.7	85.6	58.2	154.2	140.9		69	64.5	70.3	98.2	84.2	56.9	54	58.2	97.7	95.1	46.2	42.4	52.2	88.5	61.6			17
2	23	82.5	176	26.6335	Lt	Defender		118.4	112.3	55.1	214.9	196.4		106.6	99.8	58.2	183.3	173.1	96.6	79.1	61.7	156.6	140.2	72.3	58.4	77.9	92.8	80.2			13
2	23	62	176	20.0155	Rt	Defender		104.1	97.7	66.6	156.4	143.2		96.8	84.7	67	144.4	139.5	60.O	52.4	41.9	143.1	122	39.6	35.7	32.5	121.8	100.7			13
2	24	71	182	21.4346	Rt	Defender		92.2	83	118.4	77.9	62		86.7	67.8	140.7	61.6	41.9	55.5	48.7	163.3	34	21.4	26.8	13.3	356.5	7.5	5.8			20
2	21	63.5	175	20.7347	Rt	Defender		88.7	80.3	52	170.6	149.9		85.7	72.4	57.4	149.3	135.7	68.1	63.6	81.7	83.4	70.1	48.6	44.4	57.6	84.3	68.4			18
2	19	62	175	20.2449	Lt	Defender		99.5	88.5	54.6	182.3	171.6		81.1	66.5	60.3	134.6	111.4	62.4	57.8	50	125	99.1	25.2	21.4	39.9	63.3	35.1			19
2	20	77	181	23.5036	LT	Defender		112	101.2	71.2	157.3	136.9		101	86.8	91.2	110.7	95.3	70.6	55.9	77.7	90.9	73.6	33.4	30	96.7	24.5	24.2			20
2	22	69	174	22.7903	RT	Defender		66.2	63.5	52.8	125.3	112.4		63.5	61	56.9	111.7	98.9	51.9	47.9	75.9	68.4	60.4	37.2	30.6	89.2	41.7	33.4			20
2	19	74.5	178	23.5134	Rt	Defender		79.5	70.3	73.3	108.5	101.6		74.2	64.5	76.5	97	86.6	69.8	58.8	105.9	65.9	55.9	47.3	37	99.1	47.8	34.4			16
2	21	63.5	164	23.6095	Lt	Defender		78.6	67.6	80.2	98	86.8		67	56.8	74.6	89.7	70.4	47.2	43.9	99.2	47.6	41.4	35.3	32.4	90.7	38.9	29.8			15
2	28	56	163	21.0772	Rt	Defender		77.9	73.9	61.6	126.5	95.6		72.3	68.5	71.4	101.3	86.2	69.3	60.1	71.3	97.2	83.2	52.8	50.9	69.9	75.5	66.3			18
2	29	84	176	27.1178	Rt	Defender		128.7	119.9	72.3	178	164.8		97.1	92.3	65.3	148.7	134.9	96.8	86	86.9	111.4	84.3	83.8	71.8	91.8	91.3	82.3			17
2	23	71.5	186	20.6671	Rt	Defender		96.3	82.9	56.8	169.4	146.3		76.9	66.6	51.5	149.3	122.7	59.1	43.5	69.3	85.3	69.1	18.7	11.5	98.2	19.1	15.4			18
2	25	68.5	167	24.5617	Lt	Defender		76.5	66.2	70.8	108.1	94.5		59.6	49.7	67.8	88	62.8	51.7	47.4	74.1	69.7	58.5	51.5	34.5	72.5	71.1	46.4			14
2	19	61.5	170	21.2803	Rt	Defender		105.1	94.8	58.7	179.1	165		90.4	84.3	43.3	208.8	180.6	48.2	42.8	41.6	117.6	104.4	43.7	36.7	42.2	104.1	79.2			12
2	22	73.5	178	23.1978	Rt	Defender		104	99.1	50.4	206.2	176.1		98.4	74	54	182.1	158	80.1	65.3	95.2	84.2	71.8	42.5	34.2	76.3	55.8	39			17
2	22	74	177	23.6203	Rt	Defender		106.3	95.9	80.5	132	114.6		102.8	92.7	72.5	141.9	120.8	68	62	225.2	30.2	21	46.6	38.2	79.4	58.7	18.9			17
2	21	62	166	22.4996	Rt	Defender		72.7	65.9	56.1	129.6	116.2		75.1	70.4	69.7	107.8	101.6	68.8	57.2	76	90.5	86.1	47.4	36.7	56.4	84	72.8			19
3	32	58	167	20.7967	Lt	Midfielder		50.7	48.8	47	107.9	96.1		40.3	37.3	68.5	58.9	56	88.7	76.9	58.3	152.1	141.3	76	70.4	57.1	133.1	87.3			20
3	19	73	179	22.7833	Rt	Midfielder		112.3	102.5	57.4	195.5	182.4		116.2	98.5	61.5	188.9	173.8	62.1	60	40.9	152	145.6	43.3	40	33.2	130.4	122.7			16
3	22	61.5	173	20.5486	Rt	Midfielder		91	83.2	68.6	132.7	121.5		82.1	71.2	78.4	104.7	95.3	50	48.8	42.5	117.7	99.8	30.2	26	28.8	104.9	81.6			16
3	19	75	177	23.9395	Rt	Midfielder		109.3	99	55.8	195.9	182.9		92.1	90.3	48.9	188.3	170	85.5	66.2	72.7	117.6	112.7	56.8	46.9	47.2	120.3	115.2			18
3	31	75.4	182	22.763	Rt	Midfielder		51.2	46.6	54	94.9	73.3		48.3	42.7	65.9	73.3	63.1	65.6	45.4	79.8	82.1	51.2	16	9.4	59.2	27	17			15
3	18	62.7	176	20.2415	Rt	Midfielder		74.4	70.7	66	112.7	105.5		69.3	58.7	64.5	107.5	83.9	49	46.9	80	61.3	56.7	42.8	40.4	105.5	40.6	38.3			17
3	24	65.5	166	23.7698	Rt	Midfielder		94.8	85	47.2	200.9	173.7		93.1	84.9	50.2	185.3	169.5	59.1	57.2	53.3	111	103.1	35.8	32.5	49	73.1	63.7			18
3	26	67.1	166	24.3504	Lt	Midfielder		119.7	86.8	88.3	135.6	110.5		86	77.1	59.8	143.9	120.3	78	60.7	95.6	81.6	60	74.2	65.7	200.3	37	31.3			15
3	34	70	172	23.6614	Rt	Midfielder		97	88.5	86.1	112.7	88.2		56.7	49.6	159	35.7	28.1	62.5	50.7	154.8	40.3	32.1	33.9	28.8	127.1	26.7	13.2			15
3	30	73	172	24.6755	LT	Midfielder		107.9	82.6	60.6	177.9	154.5		96.6	86.6	56.7	170.5	156.9	77.3	67.9	48.2	160.5	141.2	58.5	46.2	51	114.5	97.7			19
3	19	64.5	168	22.8529	RT	Midfielder		130.7	109.7	94.6	138.2	125.8		86.6	81.5	63.9	135.6	98.5	76.2	62.2	74.7	102.1	84.5	56.7	48.2	64.8	87.5	50.1			16
3	18	58	162	22.1003	LT	Midfielder		70.9	67.9	129.4	54.8	45.2		59.4	53.9	120.7	49.2	35.5	43.2	40.4	197.1	21.9	15.1	24.8	19.4	227.7	10.9	7.3			14
3	21	60	172	20.2812	RT	Midfielder		68.7	61	79.1	87	74.1		66.4	57.5	97.1	68.3	56.2	51.8	44.7	115.8	44.8	35.1	32.9	24	82.7	39.7	27.5			17
3	29	70.5	170	24.3945	RT	Midfielder		102.3	99.5	77.1	132.6	117.3		99	94.2	71.4	138.7	121	51.3	49.3	82.4	62.3	53.7	47.5	24.2	78.4	60.6	49.9			14
3	20	73.5	177	23.4607	RT	Midfielder		91	86.4	119	76.5	71.9		85.5	80.4	180.9	47.3	43.8	45.5	43	127.6	35.7	34.3	32.7	24.4	184.2	17.7	13			18
3	21	67	182	20.227	RT	Midfielder		93.7	83.3	88.6	105.8	94.8		90.9	68.5	112.8	82.6	74.6	71.7	61.3	73.1	98.1	81.1	54.3	46.5	65.1	83.4	69.8			19
3	20	65	171	22.2291	RT	Midfielder		89.2	85.1	72.2	123.6	99		75.2	59.2	130.3	57.7	53.5	65.2	60.6	105.3	61.9	38.9	51.5	26.7	132.8	38.8	23.4			14
3	31	68	175	22.2041	RT	Midfielder		97	85.2	59.6	162.7	141.1		74	71	66.8	110.8	98.6	73.1	61.7	78.5	93.1	76.1	44	32	177.2	24.8	15.6			16
3	22	71	176	22.921	RT	Midfielder		102.5	96.6	68.2	150.2	131.6		78.7	54.9	165.4	47.6	40.5	74.2	61.1	93.2	79.6	61.7	53.4	46.8	136.7	39.1	27.2			18
3	20	65	176	20.984	LT	Midfielder		99.1	92.3	74.6	132.8	111.6		85.8	80.7	105.3	81.5	66.5	68.6	59.3	191.8	35.8	30.6	22.3	18.2	159.2	14	6.4			17
3	19	71	168	25.1559	RT	Midfielder		97.8	83	77.4	126.3	115.9		93.8	89.2	66.8	140.3	128.2	65.4	59.3	69.9	107.4	82.1	40	36.8	63.7	62.8	57.2			15
3	22	65.5	170	22.6644	RT	Midfielder		86.6	82.5	129.5	66.9	61.6		83.5	78.7	143.6	58.1	43.1	33.9	24.1	98.2	34.5	19	38.7	29.1	133.3	29.1	23			20
3	19	51	172	17.239	RT	Midfielder		78.4	70.9	47.7	164.4	151.4		70.9	64.9	47.3	149.9	143.8	58.3	52.9	59.7	97.7	90.7	62.2	54.4	69.4	89.7	81.1			17
3	18	69	174	22.7903	RT	Midfielder		99.8	90	55.1	181	170.6		89.4	79.6	60.3	148.3	137.8	66.3	62.3	47.6	139.1	121.4	49.2	42.5	51.6	95.4	81.5			17
4	18	71.8	183	21.4399	RT	ATTACKER		97.8	93.5	60.5	161.7	145.3		90.3	88.7	55.6	166.1	149.9	67.8	60.3	68.5	99	91.4	61	56.2	70.4	86.6	82.2			18
4	25	71	178	22.4088	RT	ATTACKER		86.2	65.4	74.1	117.2	107		80.5	67.1	76.7	104.9	88.4	52.7	42.3	80.9	65.2	50.9	16.5	11.4	57.6	28.6	21.3			15
4	30	76	170	26.2976	rt	ATTACKER		104.3	93.9	61.2	170.6	141.4		83.3	74.9	74.7	111.5	99.5	103.6	96.2	106.2	97.5	85.5	72.5	65.5	123	58.9	50.1			19
4	22	66	180	20.3704	RT	ATTACKER		95.6	86.5	62.9	152	142.5		96.8	91.4	65.6	147.6	131.1	74.5	64.7	64.6	115.4	107.6	51.1	46.5	47.7	107.2	101.4			19
4	32	77	186	22.2569	RT	ATTACKER		102.4	88.5	60.9	168.1	153.3		86.7	76.1	79.2	109.6	91.7	85.1	82.1	119	71.5	65.3	25.1	20.7	162.1	15.5	12.8			15
4	19	75	186	21.6788	RT	ATTACKER		94.1	87.3	65.4	143.8	126.4		92.5	88	86.6	106.7	97.4	55	51	59.7	92.2	80.2	64	54.7	84.9	75.3	68.8			18
4	19	68.5	173	22.8875	RT	ATTACKER		137	123.3	58.8	232.8	211		111.3	106.3	47.3	235.5	218.2	48.1	43.1	37.8	127.2	102	39.4	31.6	33.3	118.5	106.1			10
4	19	53.5	165	19.6511	RT	ATTACKER		76	70.4	68.2	111.4	95.2		66.1	62.2	72.7	91	73.1	36.2	32.8	70.8	51.1	44.5	24.5	20.5	42.2	58.2	48.2			12
4	21	53	165	19.4674	RT	ATTACKER		61.3	55.1	48	127.7	106.3		39.6	34.2	37.6	105.2	93.3	94.4	90	53.1	177.9	147.5	78.9	71.2	77.9	101.3	88.6			21
4	22	61	166	22.1367	RT	ATTACKER		87.2	80.1	56.8	153.7	134.8		81.7	67.8	58.1	140.6	104.5	61.8	57.3	62.4	99	89.4	53.2	38.5	82.3	64.7	52.3			20
4	27	84	181	25.6402	RT	ATTACKER		79.1	69.5	65.9	120	109.3		88.5	67	68.4	129.4	122.2	57.6	43.9	52.1	110.6	102.4	66.8	45.3	55.9	119.4	113			19
4	18	56.5	165	20.753	RT	ATTACKER		96.3	86.5	59.2	162.7	149.4		91.3	81.3	59	154.9	122.2	78.9	70.7	61	129.2	114	54.5	50.1	48.9	111.5	97.2			15
4	23	73	175	23.8367	RT	ATTACKER		140.8	121.5	66.8	210.6	178.8		104.8	98.6	81.3	128.9	108.6	46.3	395	33.5	138.2	126.2	28.3	23.5	28.6	98.8	82.3			10
4	18	71	174	23.4509	RT	ATTACKER		112.9	108.2	68.3	165.5	133.6		104.5	94.5	66.1	157.9	142.9	78.4	58.7	61.6	127.2	108.1	41.3	33.4	44.8	92.1	87.4			14
4	20	58	177	18.5132	RT	ATTACKER		77.7	73.2	71	109.4	69		65.7	61.6	80.9	81.2	64.7	55.2	53.7	63.7	86.8	75.8	56.4	49.3	71.3	79.1	70.4			16
4	34	85	180	26.2346	RT	ATTACKER		122.2	115.1	72	169.5	160.2		103.3	99.6	69.5	148.5	141.4	93.2	81.7	75.1	124.1	106.3	78.3	65.4	94.1	83.2	72.8			16
4	22	63	163	23.7118	RT	ATTACKER		67.4	62.7	46.1	146.2	130		65.8	56.3	47.4	138.7	133.9	58.4	48	68.9	84.8	77.3	45.3	35.2	54.2	83.6	75.8			16
4	34	73	179	22.7833	RT	ATTACKER		96.5	85.9	75.8	127.3	102.5		77	73.2	62.8	122.5	95.6	71.7	63.9	73.2	97.9	57.2	26.8	23	65.7	40.7	29.1			18
4	23	60.5	167	21.6931	RT	ATTACKER		94.7	87.1	61	155.2	143		81.9	77.3	62.5	131.1	122.3	75.4	67	70.5	106.9	93	42.9	38.6	40.2	106.7	99.5			16
4	21	68	172	22.9854	RT	ATTACKER		79.6	77	60.9	130.7	121.7		78.9	66.3	79.6	99.1	91.3	78.9	71.5	147.3	53.6	49.4	69.9	62.8	81.8	85.5	73.5			16
4	19	59.5	175	19.4286	LT	ATTACKER		53.6	48.7	73.7	72.8	66.3		54.7	47.4	71.3	76.8	53.7	49.7	46.2	149.1	33.4	20	48	39.6	156.2	30.8	24.6			12
4	25	75	183	22.3954	RT	ATTACKER		129.6	118.7	77.7	166.8	154.6		114.6	105.6	91.8	124.8	117.3	84	80.1	55.6	150.9	118.2	71.6	65.5	63.8	112.2	101.9			9
4	24	76	184	22.448	RT	ATTACKER		105.2	95.4	68.2	154.2	123.9		92.8	83.9	52.9	175.5	142.2	52.6	49.6	46.3	113.6	93.9	42.5	32.9	42	101.1	85			19
4	20	73.5	178	23.1978	RT	ATTACKER		76	63.9	84.2	90.3	73.6		73.7	62.9	74.8	98.5	80.2	51.4	41.5	130.3	39.5	29.1	26.4	21.3	160	16.5	15.5			21
